# Supplementary material
Source: MDPI journal article supplement (https://www.mdpi.com/2073-4395/10/12/1961)
Supplement: s1 [file s1]

## SUPPLEMENTARY FIGURES

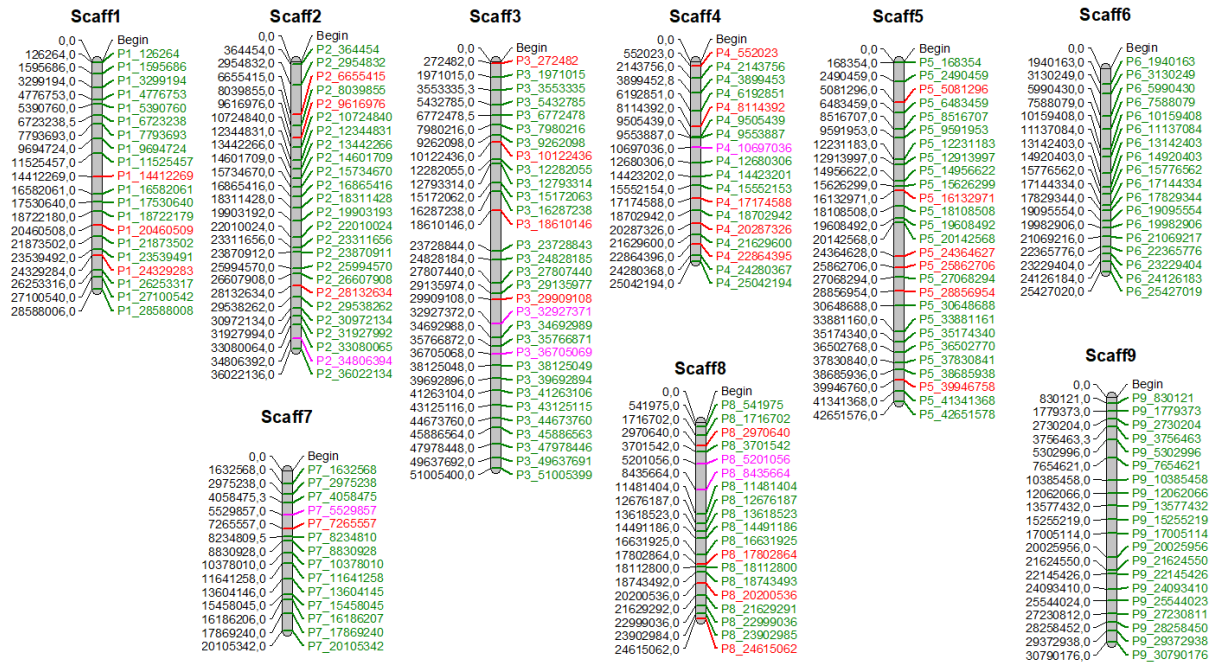

**Figure S1:** Physical distribution of the 192 selected DSNPs along the nine chromosomes. Red SNPs failed genotyping (26), purple SNPs had % NA > 20% (7), Green SNPs were assigned to a linkage group on the map (159).

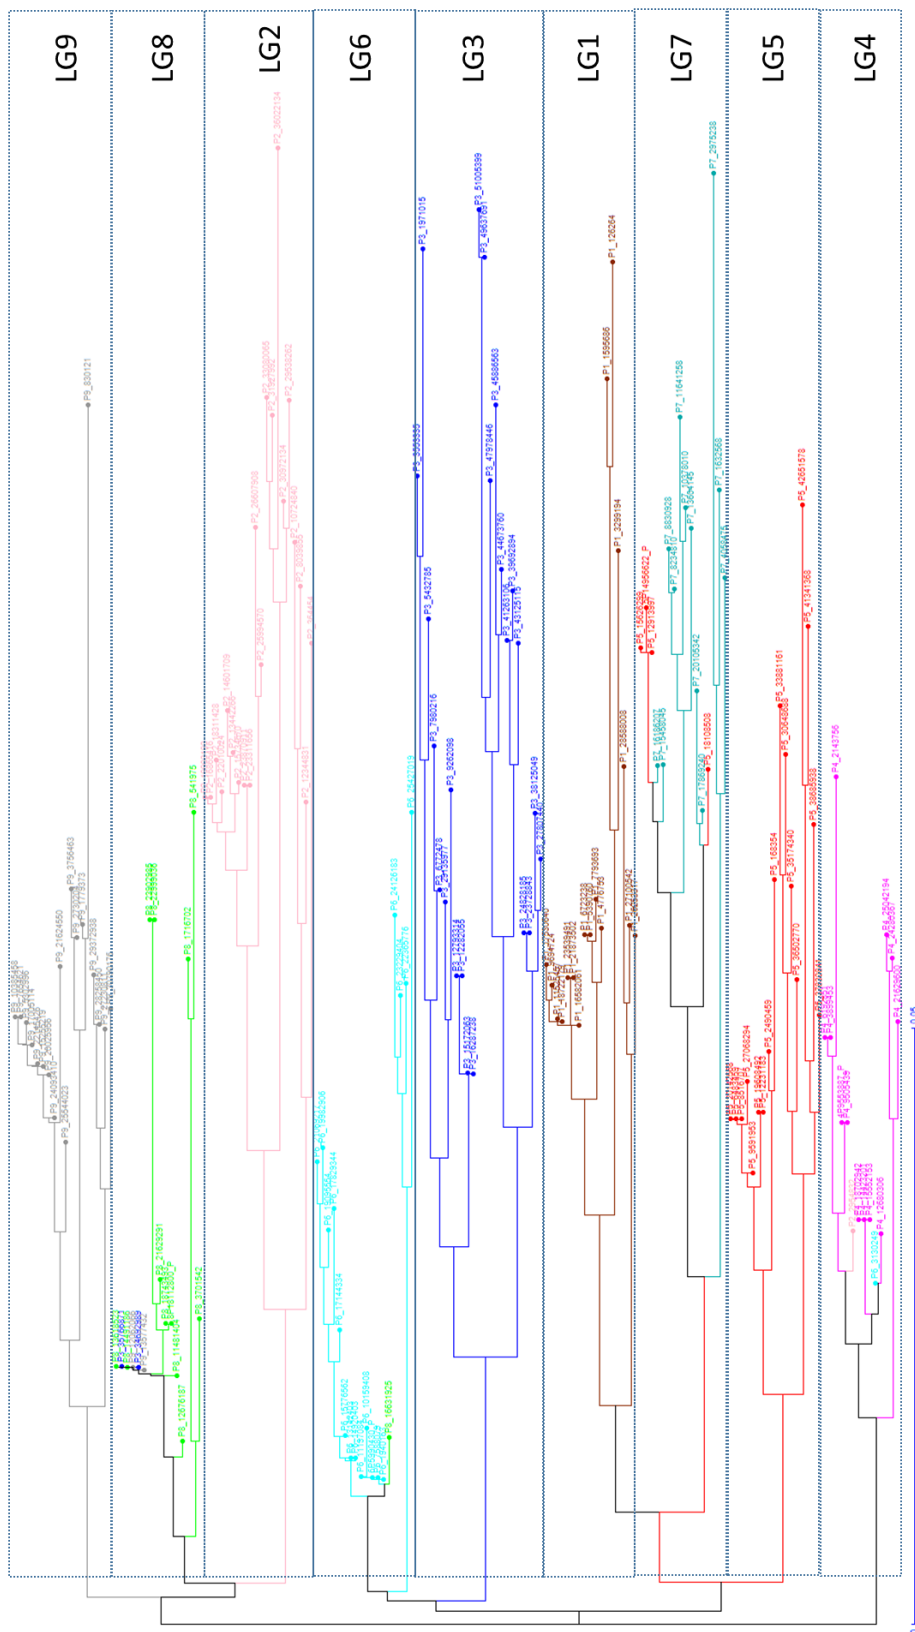

ate inheritance with  
us rootstock breeding.

**Figure S2:** Neighbor-joining tree showing relationships between the 159 markers of the tetraploid Citrumelo genetic map; NJ tree analysis based on Manhattan dissimilarity index between markers established with Darwin Software.

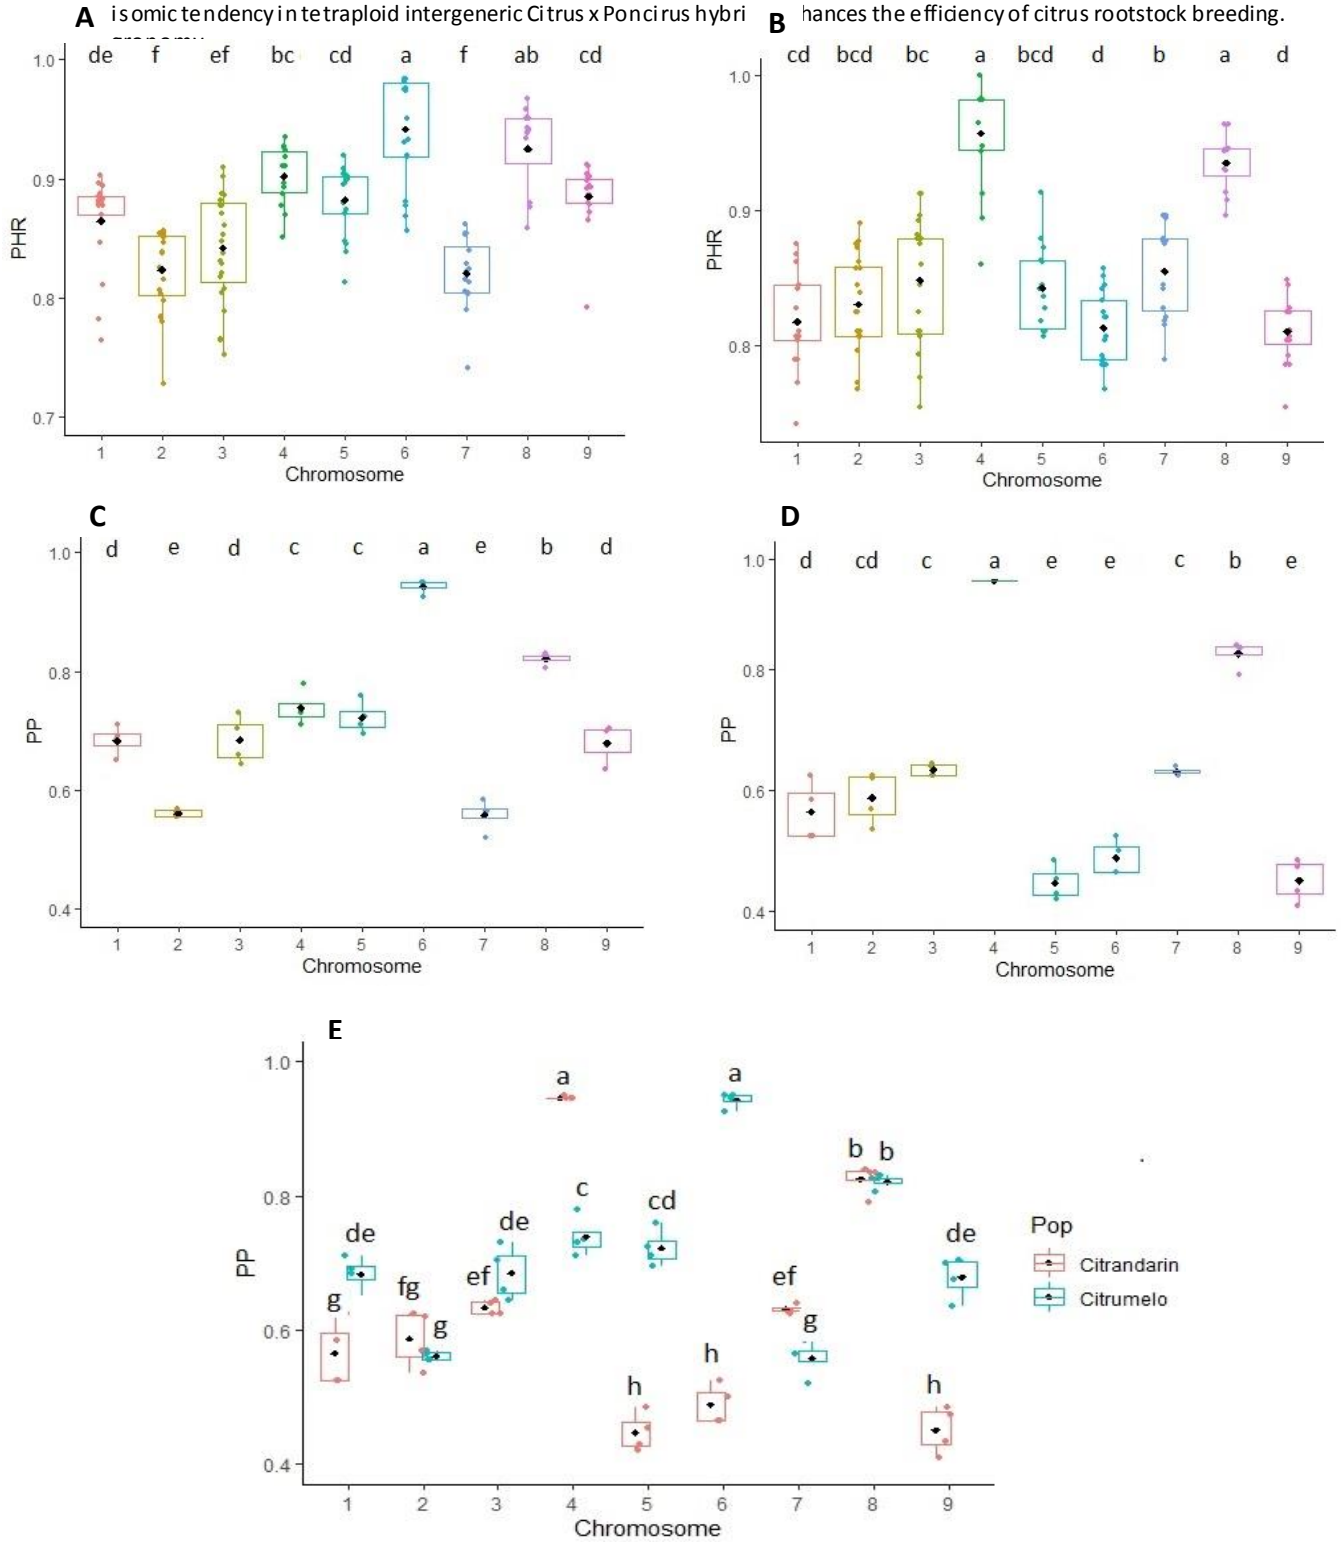

**Figure S3:** Graphical representations showing the meiotic behavior of the tetraploid 4475 Citrumelo and tetraploid Citrandarin. PHR: Parental heterozygosity restitution; PP: Preferential pairing. (A) PHR of Citrumelo population (Kruskal-Wallis:  $p$ -value  $< 2.2e^{-16}$ ); (B) PHR of the Citrandarin population (Kruskal-Wallis:  $p$ -value  $< 7.636e^{-15}$ ); (C) PP of Citrumelo population (one-way ANOVA:  $p$ -value  $< 2.2e^{-16}$ ); (D) PP of Citrandarin population (one-way ANOVA:  $p$ -value  $< 2.2e^{-16}$ ); (E) PP value from both Citrumelo and Citrandarin population (two-way ANOVA:  $p$ -value  $< 2.2e^{-16}$ ). PHR ranks were estimated using a Wilcoxon and the PP rank using a Newman-Keuls test at a  $p$ -value  $< 0.05$ .
